# Supplementary material for: A photoelectrochemical immunosensor based on CdS/CdTe-cosensitized SnO2 as a platform for the ultrasensitive detection of amyloid β-protein
Source: Royal Society of Chemistry journal article supplement (doi:10.1039/c9an01848d), 2019-11-13
Supplement: c9an01848d1.pdf [file c9an01848d1.pdf]

*Supplementary materials*

**Photoelectrochemical immunosensor based on CdS/CdTe cosensitized  
SnO<sub>2</sub> as platform for ultrasensitive detection of amyloid  $\beta$ -protein**

Nuo Zhang, Yaoguang Wang\*, Guanhui Zhao, Chao Wang, Yueyuan Li, Yong Zhang,  
Huan Wang, Qin Wei\*

Collaborative Innovation Center for Green Chemical Manufacturing and Accurate  
Detection, Key Laboratory of Interfacial Reaction & Sensing Analysis in Universities of  
Shandong, School of Chemistry and Chemical Engineering, University of Jinan, Jinan  
250022, P.R. China

\*Corresponding authors. Tel. +86 531 82767872; fax: +86 531 82767367.

E-mail address: wangyaoguang9002@163.com; sdjndxwq@163.com.

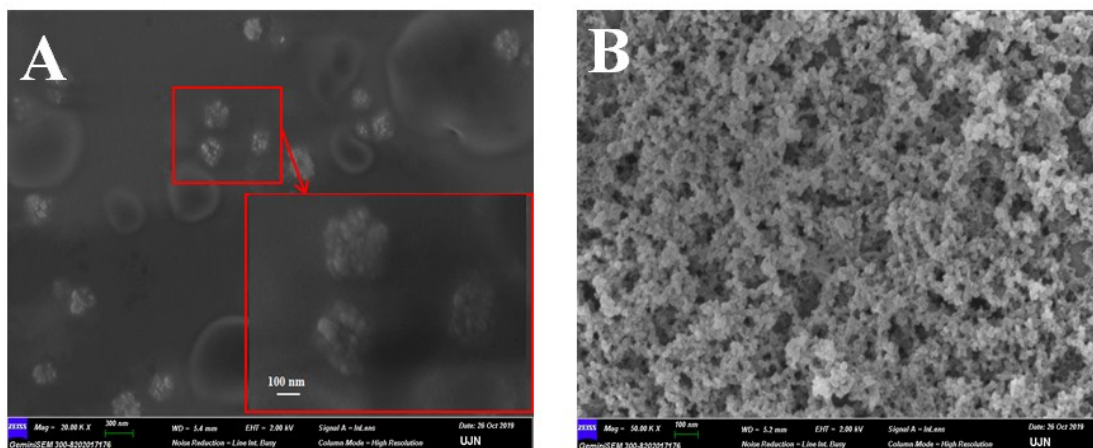

Figure S1. SEM image of CdTe (A) and CdS (B).

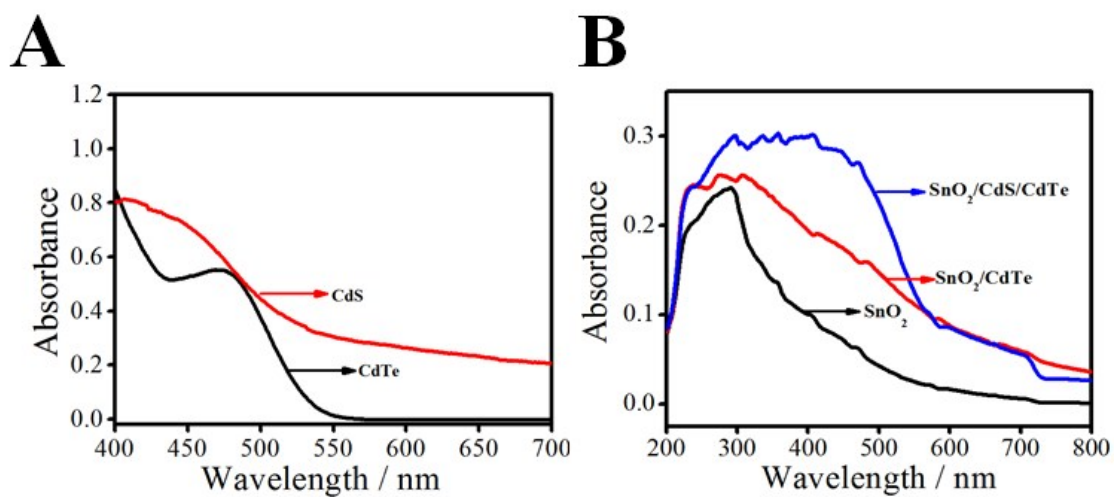

Figure S2. UV-vis absorption spectra of CdTe and CdS (A) and UV-vis diffuse reflectance spectra of SnO<sub>2</sub>, SnO<sub>2</sub>/CdTe and SnO<sub>2</sub>/CdS/CdTe.

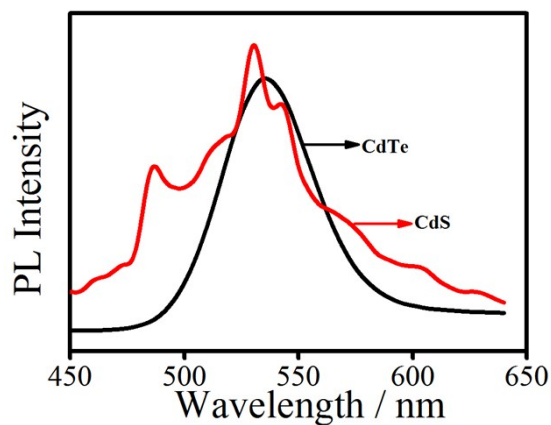

Figure S3. Fluorescence emission spectrum of CdTe and CdS.

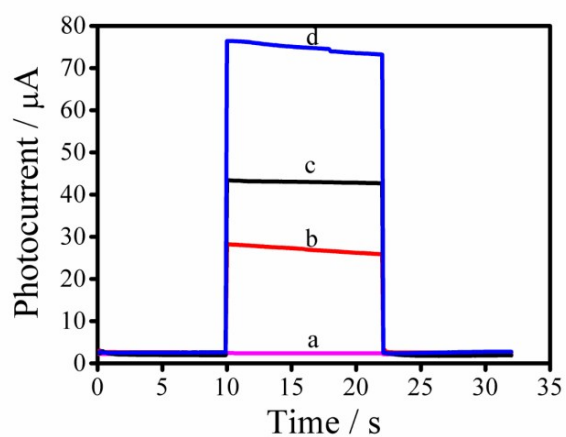

Figure S4. Photocurrent responses of ITO/SnO<sub>2</sub> (a), ITO/SnO<sub>2</sub>/CdTe (b), ITO/SnO<sub>2</sub>/CdS (c) and ITO/SnO<sub>2</sub>/CdS/CdTe (d) electrodes.

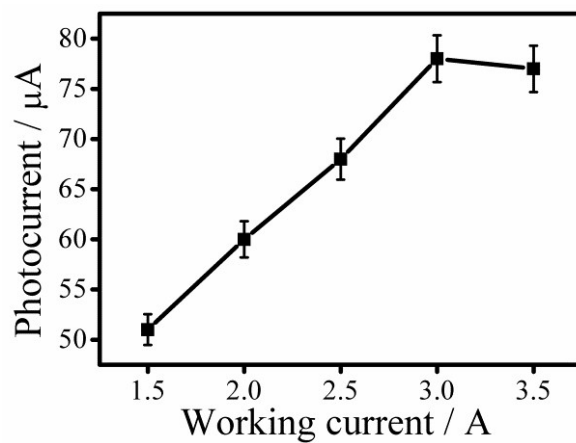

Figure S5. The effect of working current intensity on the photocurrent response of the immunosensor.

Table S1. Comparison of the performance of the proposed label-free PEC immunosensor for A $\beta$  detection with other reports

| Detection method                                | Linear range<br>(pg·mL <sup>-1</sup> )        | Detection limit<br>(pg·mL <sup>-1</sup> ) | References |
|-------------------------------------------------|-----------------------------------------------|-------------------------------------------|------------|
| Electrochemiluminescence immunosensor           | 0.1 - 5.0 × 10 <sup>4</sup>                   | 0.054                                     | 1          |
| Electrochemiluminescence immunosensor           | 0.05 - 1.0 × 10 <sup>4</sup>                  | 0.021                                     | 2          |
| Electrochemical immunosensor                    | 10 - 1.0 × 10 <sup>3</sup>                    | 5.2                                       | 3          |
| Electrochemical immunosensor                    | 88 - 4.4 × 10 <sup>5</sup>                    | 35                                        | 4          |
| Fluorescence detection method                   | 8.8 × 10 <sup>4</sup> - 4.4 × 10 <sup>7</sup> | 5.5 × 10 <sup>4</sup>                     | 5          |
| Electrochemical impedance spectroscopy analysis | 1.0 - 1.0 × 10 <sup>4</sup>                   | 1.0                                       | 6          |
| Photoelectrochemical immunosensor               | 0.50 - 1.0 × 10 <sup>4</sup>                  | 0.18                                      | This work  |

Table S2. The results of the A $\beta$  determination in human serum samples

| Content in samples (ng·mL <sup>-1</sup> ) | Added content (ng·mL <sup>-1</sup> ) | Found (ng·mL <sup>-1</sup> )* |       | RSD (n=3, %) |       | Recovery (%) |        |
|-------------------------------------------|--------------------------------------|-------------------------------|-------|--------------|-------|--------------|--------|
|                                           |                                      | Our method                    | ELISA | Our method   | ELISA | Our method   | ELIS A |
| 0.10                                      | 0.10                                 | 0.212                         | 0.204 | 8.2          | 7.4   | 106.5        | 101.8  |
|                                           | 0.20                                 | 0.296                         | 0.314 | 7.2          | 7.1   | 98.7         | 104.6  |
| 0.30                                      | 0.10                                 | 0.409                         | 0.405 | 6.0          | 4.6   | 102.2        | 101.2  |
|                                           | 0.20                                 | 0.502                         | 0.510 | 3.6          | 3.2   | 100.5        | 102.1  |

\*The average value of three successive measurements.

## References:

1. J. Xue, L. Yang, H. Wang, T. Yan, D. Fan, R. Feng, B. Du, Q. Wei and H. Ju, *Biosens. Bioelectron.*, 2019, **133**, 192-198.
2. X. Li, D. Wu, H. Ma, H. Wang, Y. Wang, D. Fan, B. Du, Q. Wei and N. Zhang, *Biosens. Bioelectron.*, 2019, **131**, 136-142.
3. P. Carneiro, J. Loureiro, C. Delerue-Matos, S. Morais and M. d. C. Pereira, *Sensor. Actuat. B-Chem.*, 2017, **239**, 157-165.
4. N. Xia, X. Wang, B. Zhou, Y. Wu, W. Mao and L. Liu, *ACS Appl. Mater. Inter.*, 2016, **8**, 19303-19311.
5. L. Liu, Y. Chang, J. Yu, M. Jiang and N. Xia, *Sensor. Actuat. B-Chem.*, 2017, **251**, 359-365.
6. C.-C. Wu, B.-C. Ku, C.-H. Ko, C.-C. Chiu, G.-J. Wang, Y.-H. Yang and S.-J. Wu, *Electrochim. Acta*, 2014, **134**, 249-257.
